# Supplementary material for: Using genome-wide CRISPR library screening with library resistant DCK to find new sources of Ara-C drug resistance in AML
Source: PubMed Central journal article supplement (PMC5093682; doi:10.1038/srep36199), 2016-11-03
Supplement: srep36199-s1.pdf [file srep36199-s1.pdf]

# **Using genome-wide CRISPR library screening with library resistant DCK to find new sources of Ara-C drug resistance in AML**

Morito Kurata<sup>1,2,\*</sup>, Susan K. Rathe<sup>1</sup>, Natashay J. Bailey<sup>1</sup>, Natalie K. Aumann<sup>1</sup>,  
Justine M. Jones<sup>1</sup>, G. Willemijn Veldhuijzen<sup>1</sup>, Branden S. Moriarity<sup>1,3,4</sup>, David A.  
Largaespada<sup>1,3,4,5</sup>

## **Supplementary Figures and Tables**

# Supplementary Fig. S1 Kurata et al

U937 (Ara-C: 1 $\mu$ g/ml)

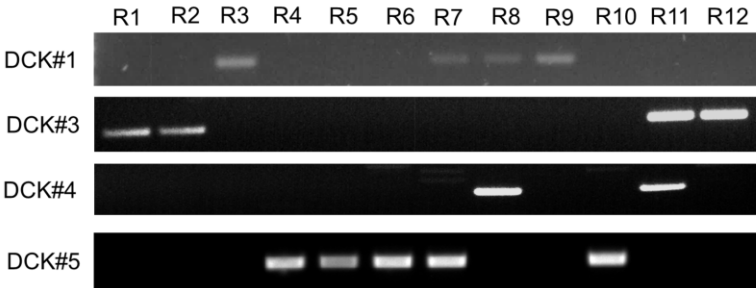

MOLM13 (Ara-C: 1 $\mu$ g/ml)

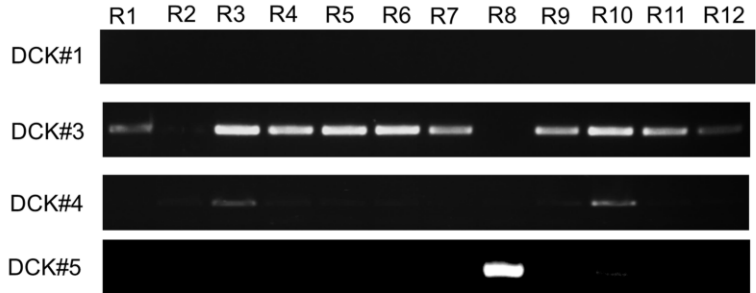

Supplementary Fig. S2 Kurata et al

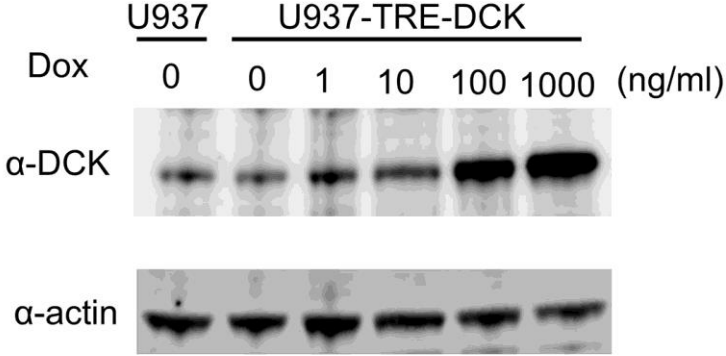

# Supplementary Fig. S3 Kurata et al

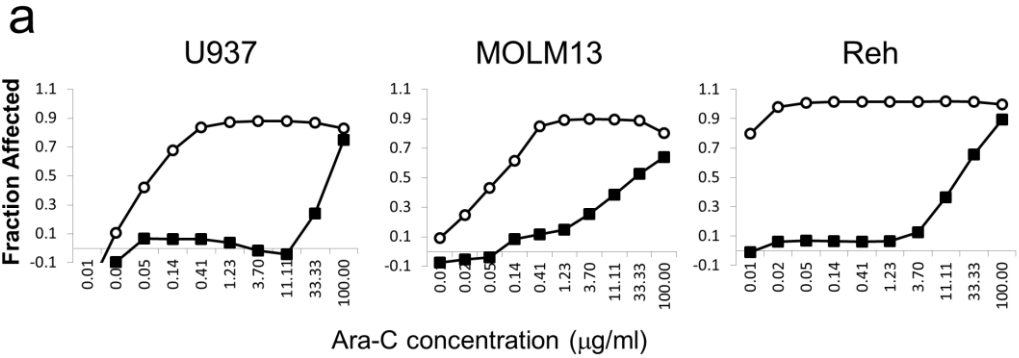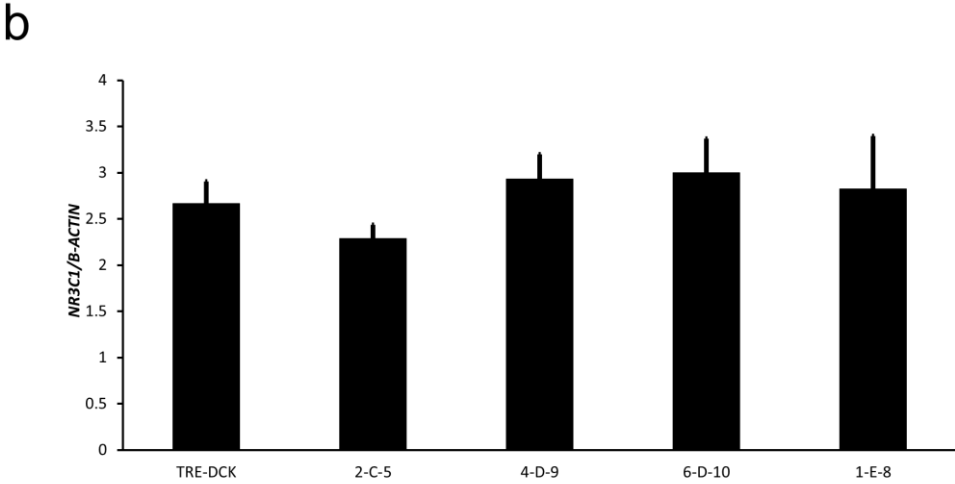

**Supplementary Fig. S1: gRNA for DCK specific PCR**

*DCK* specific PCR in library-transduced U937 and MOLM13 cells selected with 1  $\mu\text{g/ml}$  of Ara-C.

**Supplementary Fig. S2: Concentration depending expression of silent**

**mutant DCK** (A) Protein expression of DCK in doxycycline-inducible DCK transduced U937 cells with different concentration of doxycycline.

**Supplementary Fig. S3: CRISPR knock-out of DCK and Quantitative PCR for NR3C1 in Ara-C resistant clones.**

(a)  $\text{IC}_{50}$  for Ara-C in U937, MOLM13 and Reh with CRISPR knock-out of *DCK*

(closed square), as determined by MTS-Tetrazolium assay. *HPRT*

(*hypoxanthine phosphoribosyl transferase 1*) was used as a negative control

(opened circle).

(b) Quantitative-PCR for glucocorticoids receptor (*NR3C1*) was performed with 5'-

tgccagagttgatattcactgat-3' and 5'- tccatcacatctcccctctc-3' among Ara-C resistant

clones.

### **Supplementary Table S1: Summary of Drug Screen of 446 FDA Approved Drugs**

446 FDA approved drugs were tested in the B117P, B117H, B140P and B140H cell lines. Each drug was tested at concentration of 10 $\mu$ M. The percent of effect for each of the drugs tested were summarized and categorized.

| <b>Response of Cells to Drugs in Drug Screen</b>                    | <b>Drug Count</b> |
|---------------------------------------------------------------------|-------------------|
| B117H and B140H cells became more sensitive than parentals by > 30% | 13                |
| B117H and B140H cells became more resistant than parentals by > 30% | 3                 |
| B117H became more sensitive than B117P by > 30%                     | 15                |
| B117H became more resistant than B117P by > 30%                     | 2                 |
| B140H became more sensitive than B140H by > 30%                     | 29                |
| B140H became more resistant than B140H by > 30%                     | 1                 |
| Less than 30% change in both sets of cells                          | 165               |
| All 4 cell lines resistant to drugs (< 10% inhibition)              | 198               |
| All 4 cell lines sensitive to drugs (> 90% inhibition)              | 20                |
| <b>Total</b>                                                        | <b>446</b>        |

## Supplementary Table S2: 13 Drugs Have a Higher Effect in Ara-C

### Resistant Cells

13 of the drugs tested in the B117P, B117H, B140P and B140H cell lines had an increase in percent affected of >30% in the Ara-C resistant cell lines (B117H and B140H).

| Compound     | Description                  | Type                                      | % affect of 10 $\mu$ M on each cell line |       |       |       | Least change |
|--------------|------------------------------|-------------------------------------------|------------------------------------------|-------|-------|-------|--------------|
|              |                              |                                           | B117P                                    | B117H | B140P | B140H |              |
| SAM001246965 | AM404                        | Analgesic                                 | 48.3                                     | 95.5  | -6.7  | 52.9  | 47.2         |
| SAM001246897 | Prednisolone                 | Corticosteroid                            | 29.2                                     | 72.3  | 34.7  | 79.1  | 43.1         |
| SAM001246630 | Loteprednol etabonate        | Corticosteroid                            | 34.9                                     | 74.7  | 22.9  | 70.8  | 39.8         |
| SAM001247051 | Mesoridazine                 | Phenothiazine                             | 9.1                                      | 47.8  | -1.7  | 58.4  | 38.7         |
| SAM001247098 | R(+)-SCH-23390 hydrochloride | D <sub>1</sub> receptor antagonist        | 2.7                                      | 38.5  | 23.7  | 87.4  | 35.8         |
| SAM001247066 | CGS 12066B                   | 5-HT <sub>1b</sub> agonist                | 12.4                                     | 47.8  | -3.0  | 58.2  | 35.4         |
| SAM001246750 | Aripiprazole                 | Antipsychotic                             | -13.9                                    | 49.6  | 3.6   | 38.4  | 34.8         |
| SAM001247070 | Pergolide mesylate salt      | Dopaminergic agonist                      | -2.9                                     | 49.0  | -8.6  | 25.4  | 34.0         |
| SAM001246879 | Corticosterone               | Corticosteroid                            | 24.2                                     | 57.3  | 6.7   | 53.1  | 33.1         |
| SAM001246658 | Naftopidil                   | $\alpha$ 1-adrenergic receptor antagonist | -25.6                                    | 48.1  | -2.1  | 30.7  | 32.8         |

### Supplementary Table S3: IC<sub>50</sub>'s for Prednisolone and Dexamethasone in BXH-2 Cell Lines

The IC<sub>50</sub> for prednisolone and dexamethasone was determined using the MTS Tetrazolium Assay. Assay was repeated a minimum of 3 times. r-values > 0.88.

| Drug          | Statistic          | Cell Line |       |       |       |
|---------------|--------------------|-----------|-------|-------|-------|
|               |                    | B117P     | B117H | B140P | B140H |
| Prednisolone  | Average IC50 (μM)  | 100.198   | 3.450 | 1.547 | 0.338 |
|               | Standard Deviation | 14.348    | 0.980 | 0.952 | 0.072 |
| Dexamethasone | Average IC50 (μM)  | 1.468     | 0.183 | 0.125 | 0.032 |
|               | Standard Deviation | 0.393     | 0.047 | 0.061 | 0.006 |
